# Supplementary material for: Analysis of the reasons for screening failure in phase I clinical trials in China: a retrospective study of the clinical trials screening process
Source: PubMed Central journal article supplement — Ann Transl Med. 2021 Oct;9(20):1564. doi: 10.21037/atm-21-5010 (PMC8576730; doi:10.21037/atm-21-5010), 2021-10
Supplement: atm-09-20-1564-dss.pdf [file atm-09-20-1564-dss.pdf]

## Data Sharing Statement

|                     |                                                                                                                                                     |                                                                                                                                                                                                   |
|---------------------|-----------------------------------------------------------------------------------------------------------------------------------------------------|---------------------------------------------------------------------------------------------------------------------------------------------------------------------------------------------------|
| <b>Article Info</b> | <a href="https://dx.doi.org/10.21037/atm-21-5010">https://dx.doi.org/10.21037/atm-21-5010</a>                                                       |                                                                                                                                                                                                   |
| <b>Item</b>         | <b>Question</b>                                                                                                                                     | <b>Authors' Response<br/>(place "-" if not applicable)</b>                                                                                                                                        |
| 1                   | Would you like to share data collected for your study to others?                                                                                    | Yes                                                                                                                                                                                               |
| 2                   | If not, would you like to share the reason for your decision?                                                                                       | -                                                                                                                                                                                                 |
| 3                   | What data in particular will be shared?                                                                                                             | Demographic information, screening results, screening failure reasons, classification data and distance conversion data will be shared if requested.                                              |
| 4                   | Any other documents will be shared? Such as study protocol, statistical analysis plan, informed consent form, clinical study report, analytic code. | Statistical processes and results, experimental scheme, research report, exemption from signing informed consent and ethical approval documents in the research will also be shared if requested. |
| 5                   | When will data availability begin?                                                                                                                  | From the publication date.                                                                                                                                                                        |
| 6                   | When will data availability end?                                                                                                                    | Forever.                                                                                                                                                                                          |
| 7                   | To whom will you share the data?                                                                                                                    | Organization management personnel, project sponsor and project auxiliary personnel of drug clinical trial.                                                                                        |
| 8                   | For what type of analysis or purpose?                                                                                                               | To improve the screening failure rate of healthy subjects in drug clinical trials.                                                                                                                |
| 9                   | How or where can the data/documents be obtained?                                                                                                    | Emails could be sent to the address below to obtain the shared data:<br>zhouhuanbest@163.com.                                                                                                     |
| 10                  | Any other restrictions?                                                                                                                             | We may balance the potential benefits and risks of each request and then provide the data that could be shared.                                                                                   |
